# Supplementary material for: Reproducibility of SNV-calling in multiple sequencing runs from single tumors
Source: PubMed Central journal article supplement (PMC4741064; doi:10.7717/peerj.1508), 2016-01-04

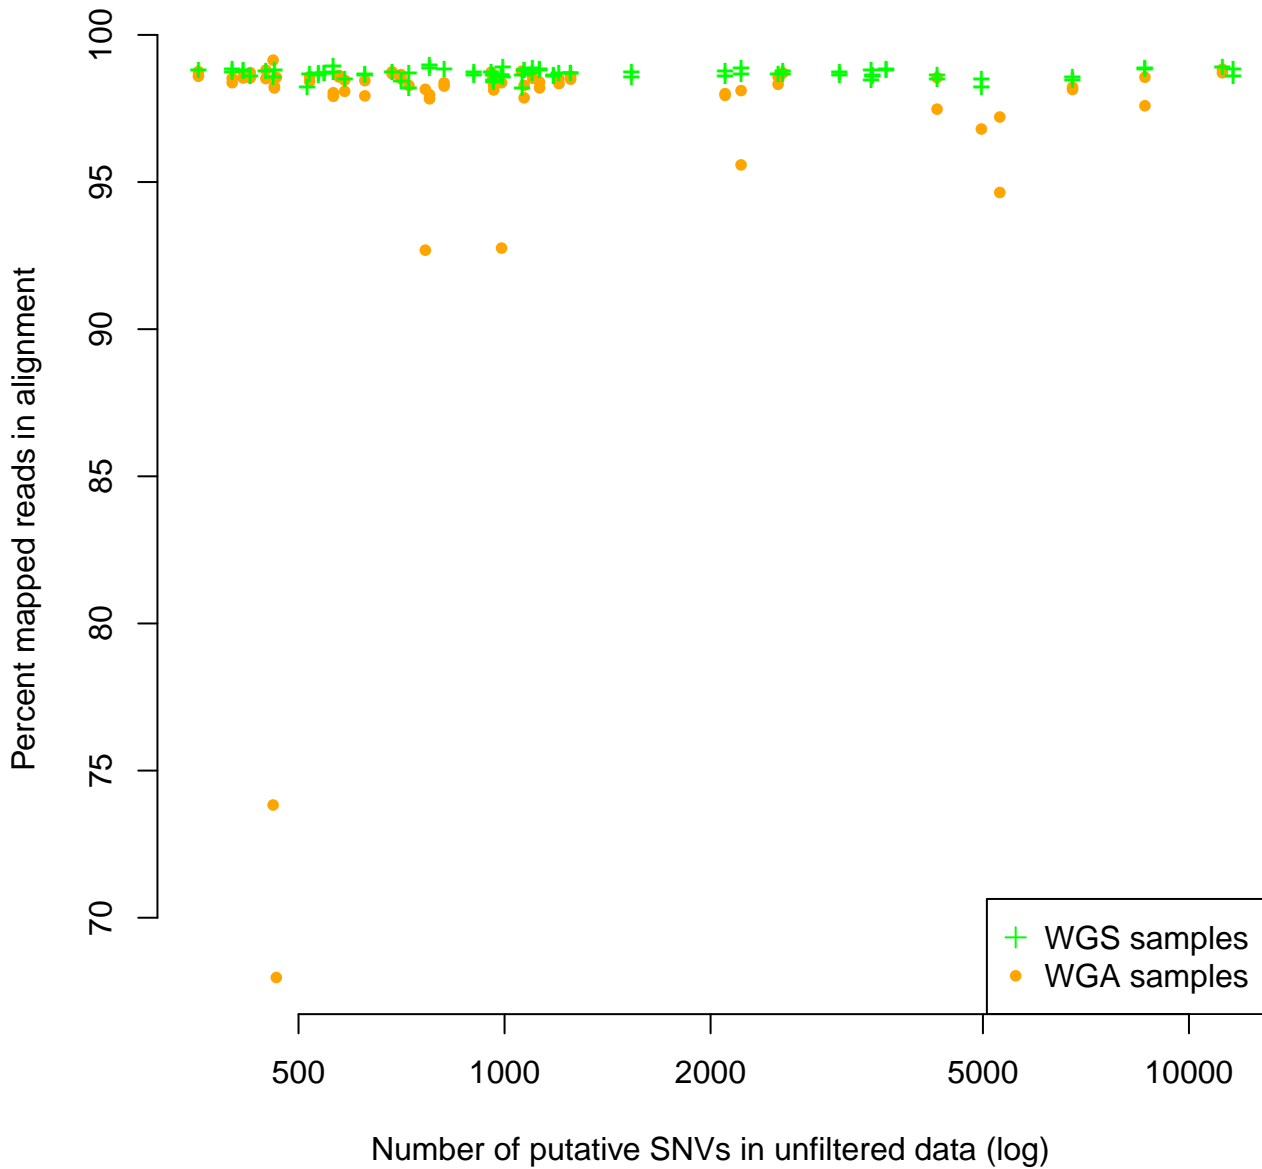

Supplement: peerj-04-1508-s003.pdf [file peerj-04-1508-s003.pdf]
