# Supplementary material for: Reproducibility of SNV-calling in multiple sequencing runs from single tumors
Source: PubMed Central journal article supplement (PMC4741064; doi:10.7717/peerj.1508), 2016-01-04
Supplement: peerj-04-1508-s004.pdf [file peerj-04-1508-s004.pdf]

| software      | purpose                                              | command                                                                                                                                                                                                          |
|---------------|------------------------------------------------------|------------------------------------------------------------------------------------------------------------------------------------------------------------------------------------------------------------------|
| picard        | regenerate fastq files from BAM file aligned to hg18 | java -d64 -Xmx4g -jar SamToFastq.jar I=\$pfx.bam F=\$pfx.1.fastq F2=\$pfx.2.fastq 2>&1                                                                                                                           |
| bwa           | align fastq files to hg19                            | bwa aln -q 30 -t 8 \$hgReference \$fastq > \$fastq.aln.sai                                                                                                                                                       |
| bwa, samtools | convert aligned fastq files into new BAM file        | bwa sampe -a 600 -P -r "\$RG" \$hgReference \$fastq1.aln.sai \$fastq2.aln.sai \$fastq1 \$fastq2   samtools view -bSh -o \$outprefix.bam -                                                                        |
| samtools      | sort and index new BAM file                          | samtools sort -@ 16 \$outprefix.bam \$outprefix.sorted 2, samtools index \$outprefix.sorted.bam 2                                                                                                                |
| samtools      | remove duplicate reads from BAM files                | samtools rmdup ../\$tumorpfx/\$tumorpfx.out.sorted.bam \$tumorpfx.dedup.bam                                                                                                                                      |
| GATK          | indel realignment                                    | java -d64 -jar \$gatkJar -R \$hgReference -T IndelRealigner -rf BadCigar -I \$tumorpfx.dedup.bam -known \$G1000.Mills -known \$G1000.Phase1.Indels -targetIntervals \$tumorpfx.intervals -o \$tumorpfx.realn.bam |
| GATK          | base recalibration                                   | java -d64 -jar \$gatkJar -nct 8 -T BaseRecalibrator -rf BadCigar -I \$tumorpfx.realn.bam -R \$hgReference -knownSites \$dbSNP -o \$tumorpfx.recal.grp                                                            |
| samtools      | index recalibrated BAM file                          | samtools index \$tumorpfx.realn.recal.bam                                                                                                                                                                        |
| SomaticSniper | call somatic mutations, generate VCF                 | bam-somaticsniper -q 40 -Q 40 -J -s 0.001 -F vcf -f \$hgReference \$tumorbam \$normalbam \$tumorpfx.SS.vcf                                                                                                       |
